# Supplementary figures and images for: Immune checkpoint inhibitor-induced inflammatory arthritis persists after immunotherapy cessation
Source: HighWire-hosted journal article supplement (doi:10.1136/annrheumdis-2019-216109), 2019-09-20

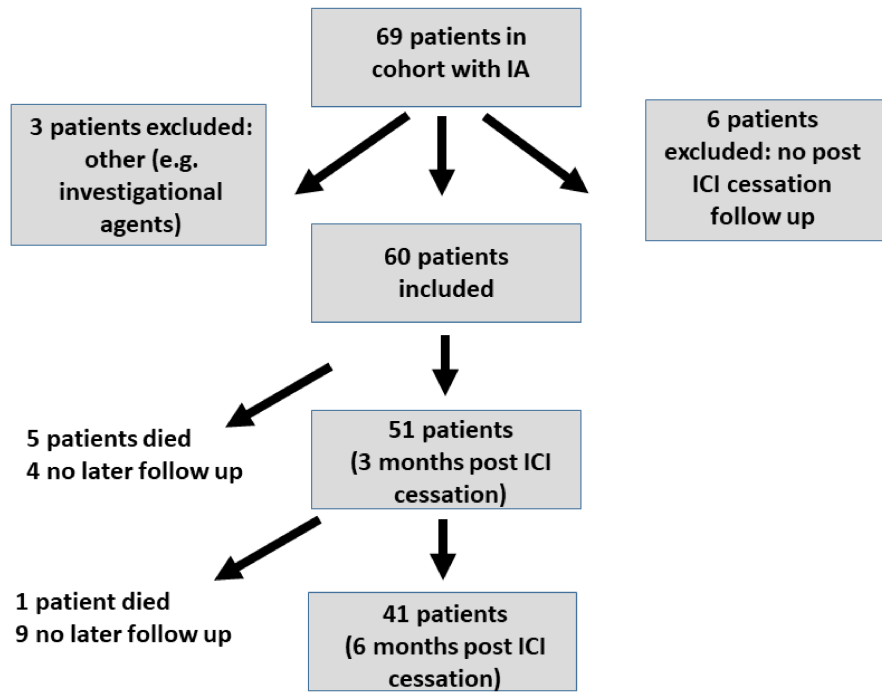

Supplement: annrheumdis-2019-216109supp001_data_supplement.pdf [file annrheumdis-2019-216109supp001_data_supplement.pdf]
